# Supplementary material for: Split-GFP Reassembly Assay: Strengths and Caveats from a Multiparametric Analysis
Source: MDPI journal article supplement (doi:10.3390/ijms232113167), 2022-10-29
Supplement: s1 [file s1]

## Supplementary Information

### Split-GFP reassembly assay: strengths and caveats from a multiparametric analysis

Christophe Bignon<sup>1\*</sup>, Antoine Gruet<sup>1#</sup> and Sonia Longhi<sup>1\*</sup>

<sup>1</sup>Architecture et Fonction des Macromolécules Biologiques (AFMB), Centre National de la Recherche Scientifique (CNRS), Aix-Marseille Université (AMU), UMR 7257, 13288 Marseille, France

<sup>#</sup> present address: Cold Spring Harbor Laboratory, Cold Spring Harbor, NY 11724, USA

\*to whom correspondence should be sent

Christophe Bignon  
AFMB, UMR 7257 CNRS and Aix-Marseille University  
163, avenue de Luminy, Case 932, 13288 Marseille Cedex 09, France  
Tel: (33) 4 91 82 55 80; Fax: (33) 4 91 26 67 20  
E-mail: [christophe.bignon@univ-amu.fr](mailto:christophe.bignon@univ-amu.fr)

Sonia Longhi  
AFMB, UMR 7257 CNRS and Aix-Marseille University  
163, avenue de Luminy, Case 932, 13288 Marseille Cedex 09, France  
Tel: (33) 4 91 82 55 80; Fax: (33) 4 91 26 67 20  
E-mail: [sonia.longhi@univ-amu.fr](mailto:sonia.longhi@univ-amu.fr)

Supplementary Figures S1

Supplementary Table S1

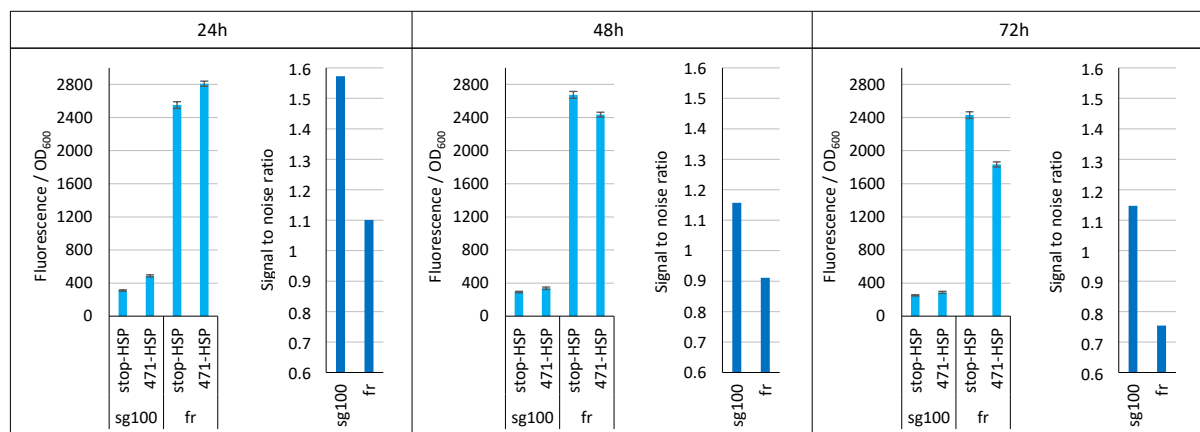

**Supplementary Figure S1.** Fluorescence to OD<sub>600</sub> ratios and signal to noise ratio of a split-GFP reassembly assay comparing results obtained at 24h, 48h and 72h with sg100 and fr and with stop-HSP and 471-HSP at 17°C.

**Supplementary Table S1. Sequence of the primers used in this study.**

| Primer         | Sequence                                                                                   |
|----------------|--------------------------------------------------------------------------------------------|
| mutGFPuv1      | GTCACTACTCTGACCTATGGTGTTCAATGCTT                                                           |
| mutGFPuv2      | CCATAGGTCAGAGTAGTGACAAGTGTTG                                                               |
| p17-Amp1       | GGGGTTCCGCGCACATTTC                                                                        |
| GFPuv1         | GATATACATATGGCTAGCCATCACCACCATCACCATGGCGCGAGTAAAGGAGAAGAAGCTTTTC                           |
| GFPuv2a        | ACCTTGTTTGTCTTCCCGGGATTGCTCGAGCCAGAGCCAGAGCCTGCCGTGATGTATACATTGTGTGAGTTATAGTTGTACTCCAGTTTG |
| MluIfrC        | GCCATGACAAAAACGCGTAACAAAAGTGTCTATAATCAC                                                    |
| AatIIR         | GACGTCGACTTCATTATTAT                                                                       |
| GFPuv3a        | ATAATAATGAAGTCGACGTCGGGTGGAAGCGGTAAGAATGGAATCAAAGCTAAC                                     |
| GFPuv4b        | GCCGGATCCTTAGTTGTACATCATTATTTGTAGAGCTCATC                                                  |
| BsrGF          | TGTACAATAAGGATCCGGC                                                                        |
| frCHindIII     | AAAGAAATGCATAAGCTTTTGCCATTCTCACCGGATTC                                                     |
| XhoIStopNtail  | CTCTGGCTCTGGCTCGAGCTAATAAACTACTGAGGACAAG                                                   |
| StopNtailBamHI | TTGTTAGCAGCCGGATCCTTATTAGTCTAGAAGATTTC                                                     |
| XhoI471        | CTCTGGCTCTGGCTCGAGCACACCCCTAGACATTGACAC                                                    |
| 471BamHI       | TTGTTAGCAGCCGGATCCTTATTAGTCTAGAAGATTTCTGTCATTG                                             |
| sfGFP1         | AGAGGGTGAAGGTGATGCAACAAACGGAAAAC                                                           |
| sfGFP2         | TTGCATCACCTTCACCCTCTCCACGGACAGAAAATT                                                       |
| sfGFP3         | GATGACGGGACCTACAAGAC                                                                       |
| sfGFP4         | GTCTTGTAGGTCCCGTCATC                                                                       |
| GFPuv2b        | TTCCCGGGATTGCTCGAGCCAGAGCCAGAGCCACCTTGTGTTGTCTGCCGTGATGTATACATTGTGTGAGTTAAAGTTGTAC         |
| p17-Amp3       | GATGGTGTCCGGGATCTCGACGC                                                                    |
| CsfGFP1b       | ATAATAATGAAGTCGACGTCGGGTGGAAGCGGTAAGAATGGA ATCAAAGCTAACTTCAAAATTCGCCACAACGTGGAAGATGG       |
| GFPuv4b        | GCCGGATCCTTAGTTGTACATCATTATTTGTAGAGCTCATC                                                  |
| sfGFP5         | GACACAATCTGTGCTTTCGAAAG                                                                    |
| sfGFP6         | CTTTCGAAAGCACAGATTGTGTC                                                                    |
| GFPuv3a        | ATAATAATGAAGTCGACGTCGGGTGGAAGCGGTAAGAATGGAATCAAAGCTAAC                                     |
| pMRBadHisR     | ATGGTGATGGTGGTGTATGTTTGTAGAGCTCATCCATGC                                                    |
| pMRBadHisF     | CATCACCACCATCACCATTAAATGATGTACAATAAGGAT                                                    |
| attB1-Hsp72    | GGGGACAAGTTTGTACAAAAAAGCAGGCTCTGCCAAAGCCGCGGCAGTCGG                                        |
| Hsp72-AttB2-AS | GGGGACCACTTTGTACAAGAAAGCTGGGTCTTAATCTACCTCCTCAATGGTGGGGCC                                  |
| Hsp72BspHI     | AAGGAGATATACTCATGAGCGCCAAAGCCGCGGCAGTCGG                                                   |
| Hsp72AatII     | CCGCTTCCACCCGACGTCGAATCTACCTCCTCAATGGTGGGGCC                                               |
| BspHI471       | AAGGAGATATACTCATGAGCACACCCCTAGACATTGACAC                                                   |
| 471AatII       | CCGCTTCCACCCGACGTCGAGTCTAGAAGATTTCTGTCATTG                                                 |

|                |                                                                                       |
|----------------|---------------------------------------------------------------------------------------|
| NeGFP1         | GATATACATATGGCTAGCCATCACCACCATCACCATATGGTGAGCAAGGGCGAGGAG                             |
| NeGFP2         | TTCCCGGGATTGCTCGAGCCAGAGCCAGAGCCACCCTGCTTGTCTGGCCATGATATAG                            |
| CEGFP1         | ATAATAATGAAGTCGACGTCGGGTGGAAGCGGTAAGAACGGCATCAAGGTGAAC                                |
| CEGFP2         | GCCGGATCCTTAGTTGTACATCATTACTTGTACAGCTCGTCCATGCC                                       |
| XhoIStopNtail  | CTCTGGCTCTGGCTCGAGCTAATAAACTACTGAGGACAAG                                              |
| StopNtailBamHI | TTGTTAGCAGCCGGATCCTTATTAGTCTAGAAGATTTC                                                |
| XhoI471        | CTCTGGCTCTGGCTCGAGCACACCCCTAGACATTGACAC                                               |
| 471BamHI       | TTGTTAGCAGCCGGATCCTTATTAGTCTAGAAGATTTCTGTCATTG                                        |
| pMR-Nco-M.XD.F | CCATG GGC GCA TCA CGC AGT GTA ATC CGC TCC                                             |
| pMR-M.XD-Aat   | GACGTCGACTTCATTATTATCTTCACCAGCAT                                                      |
| sfGFP1         | AGAGGGTGAAGGTGATGCAACAAACGGAAAAC                                                      |
| sfGFP2         | TTGCATCACCTTCACCCTCTCCACGGACAGAAAATTT                                                 |
| sfGFP3         | GATGACGGGACCTACAAGAC                                                                  |
| sfGFP4         | GTCTTGTAAGGTCCCGTCATC                                                                 |
| GFPuv2b        | TTCCCGGGATTGCTCGAGCCAGAGCCAGAGCCACCTTGTTTGTCTGCCGTGATGTATACATTGTGTGAGTTAAAGTTGTAC     |
| p17-Amp3       | GATGGTGTCCGGGATCTC GACGC                                                              |
| CsfGFP1b       | ATAATAATGAAGTCGACGTCGGGTGGAAGCGGTAAGAATGGA ATCAAAGCTAACTTCAAAATTCGCCACAACGTGGAAGATGG  |
| sfGFP5         | GACACAATCTGTGCTTTCGAAAG                                                               |
| sfGFP6         | CTTTCGAAAGCACAGATTGTGTC                                                               |
| NcoIhsb        | AAGGAGATATACCCATGGGCCCCGACGGCGGCAGCCGCGAG                                             |
| hsbAatII       | CCGCTTCCACCCGACGTCGATTCCGACGCGGCGCCCGCGC                                              |
| XhoIStopNtail  | CTCTGGCTCTGGCTCGAGCTAATAAACTACTGAGGACAAG                                              |
| StopNtailBamHI | TTGTTAGCAGCCGGATCCTTATTAGTCTAGAAGATTTC                                                |
| XhoI471        | CTCTGGCTCTGGCTCGAGCACACCCCTAGACATTGACAC                                               |
| 471BamHI       | TTGTTAGCAGCCGGATCCTTATTAGTCTAGAAGATTTCTGTCATTG                                        |
| attL1a         | ACCTGTTTCGTTGCAACAAATTGATGAGCAATGCTTTTTTATAATGCCAAGTTTGTACAAAAAAGCAGGC                |
| attL2a         | TTTTGACTGATAGTGACCTGTTTCGTTGCAACAAATTGATAAGCAATGCTTTCCTATAATGCCCACTTTGTACAAGAAAGCTGGG |
